# Supplementary material for: Genetic Diversity of Cytochrome P450s <em>CYP6M2</em> and <em>CYP6P4</em> Associated with Pyrethroid Resistance in the Major Malaria Vectors <em>Anopheles coluzzii</em> and <em>Anopheles </em><em>gambiae</em> from Yaoundé, Cameroon
Source: Preprints.org preprint supplement (doi:10.20944/preprints202211.0467.v1), 2022-11-25
Supplement: Supplementary file 1 [file supplementary]

**Figure S1: Nucleotide sequence of the 881bp of upstream region of CYP6M2 showing (a) the regulatory sequences identify by GPMiner and (b) the transcription factors binding sites using Alggen.**

**Figure S2: PCR amplification of the upstream and full-gene region of CYP6M2.**

**Figure S3: Polymorphic sites and haplotypes of the CYP6M2 upstream region in (a) *An. coluzzii* and (b) *An. gambiae* hybrid from F4.**

**Figure S4: Polymorphic sites and haplotypes of the full –gene length of CYP6M2 in (a) *An. coluzzii* and (b) *An. gambiae* hybrid from F4.**

**Figure S5: Sequencing of the portion of the full CYP6M2-gene length spanning the A392S mutation.** (a) Sequence alignment of the full CYP6M2-gene length at the A392S point mutation in HR, HS and Kisumu susceptible laboratory strain; (b) amino-acid change of the full CYP6M2-gene length at the A392S point mutation according to their phenotype and (c) Chromatogram traces showing the two genotypes at the 392-codon position.

**Figure S6: Nucleotide sequence of the 868 bp of the upstream region of CYP6P4 showing (a) the regulatory sequences identify by GPMiner and (b) the transcription factors binding sites using Alggen.**

**Figure S7: PCR amplification of the putative promoter and full-gene region of CYP6P4.**

**Figure S8: Polymorphic sites and haplotypes of the CYP6P4 upstream region in (a) *An. coluzzii* and (b) *An. gambiae* hybrid from F4.**

**Figure S9: Polymorphic sites and haplotypes of the 1,051bp fragment of CYP6P4 gene in (a) *An. coluzzii* and (b) *An. gambiae* hybrid from F4.**

**Figure S10: Sequencing of the portion of the full CYP6P4-gene length spanning the all the mutation found.** (a) Sequence alignment of the full CYP6P4-gene length at point mutation in HR, HS and Kisumu strain; (b) amino-acid change at the C168S point mutation according to their phenotype.

**Figure S11: Representative diagram of DNA-based assay to genotype a keys mutation in *An. gambiae* CYP6M2.** (a) CYP6M2 upstream region: alignment of sequences showing differences by resistance phenotype including the deletion of 7bp found in HR and HS groups link to the G/A variant generating a restriction site for the BsrDI restriction enzyme; schematic representation of the CYP6M2pr PCR-RFLP illustration digestion of the PCR amplicon and genotyping results for F4 field-resistant from Nkolondom and Susceptible Kisumu crossing. (b) CYP6M2 gene region: alignment of sequences showing A392S-mutation differences by resistance phenotype; schematic representation of the CYP6M2g AS-PCR illustration digestion of the PCR amplicon and genotyping results for F4 field-resistant from Nkolondom and Susceptible Kisumu crossing.

**Figure S12: Representative diagram of DNA-based assay to genotype a keys mutation in *An. gambiae* CYP6P4.** (a) CYP6P4 upstream region: alignment of sequences showing differences by resistance phenotype linked to the A/T (A-273-T) variant generating a restriction site for the PvuII restriction enzyme; schematic representation of the CYP6P4pr PCR-RFLP illustration digestion of the PCR amplicon and genotyping results for F4 field-resistant from Nkolondom and Susceptible Kisumu

*crossing. CYP6P4 gene region: (b) alignment of sequences showing the differences in codon 144 (C-432-T) by resistance phenotype; schematic representation of the CYP6P4g RFLP-PCR illustration digestion of the PCR amplicon and genotyping results for F4 field-resistant from Nkolondom and Susceptible Kisumu crossing; (c) alignment of sequences showing C168S-mutation differences by resistance phenotype; schematic representation of the CYP6P4g AS-PCR illustration digestion of the PCR amplicon and genotyping results for F4 field-resistant from Nkolondom and Susceptible Kisumu crossing.*
