# Supplementary material for: Genetic Diversity of Cytochrome P450s <em>CYP6M2</em> and <em>CYP6P4</em> Associated with Pyrethroid Resistance in the Major Malaria Vectors <em>Anopheles coluzzii</em> and <em>Anopheles </em><em>gambiae</em> from Yaoundé, Cameroon
Source: Preprints.org preprint supplement (doi:10.20944/preprints202211.0467.v1), 2022-11-25
Supplement: Supplementary file 2 [file supplementary]

**Table S1.** Primers of the promoter region of *CYP6M2* and *CYP6P4*

| Primer name    | Sequence 5'-3'                 | Product size | Annealing T°C |
|----------------|--------------------------------|--------------|---------------|
| 6M2p3i-Fw      | 5'-AGTACTTCACAGCGCCCAAC-3'     | 1 020bp      | 58°C          |
| 6M2pr3-Rv      | 5'-CACCACGATCCTGCCAGTAG-3'     |              |               |
| 6M2full-Fw     | 5'-GTCGGTGGACAGTCAAATTCA-3'    | 1 600bp      | 56°C          |
| 6M2full-Rv     | 5'-CTAAATCTTATCCACCTTCAA-3'    |              |               |
| CYP6P4.pr1-Fw  | 5'-GACACCGTACACGTTTCTGC-3'     | 835bp        | 65°C          |
| CYP6P4.pr1-Rv  | 5'-ATGTACGATGCGTGCTTGGA-3'     |              |               |
| CYP6P4.ful1-Fw | 5'-GCGCATGAAAGCTAGGGAT-3'      | 1 600bp      | 67°C          |
| CYP6P4.ful2-Rv | 5'-ACAGTACACTTACAATTCCTTCGG-3' |              |               |

**Fw**, primers forward, **Rv**, primers reverse.

**Table S2.** Specific primers of *CYP6M2* and *CYP6P4* diagnostic assays

| Mutation                                   | PCR type | Primers/enzymes name and sequence                                                                                                                                                               | Annealing T°C | Products size                                                                                            |
|--------------------------------------------|----------|-------------------------------------------------------------------------------------------------------------------------------------------------------------------------------------------------|---------------|----------------------------------------------------------------------------------------------------------|
| A/G in <i>CYP6M2</i> promoter              | RFLP-PCR | 6M2p <sub>fw</sub> : GAAGCCGATGCTTGAGATAAGA<br>6M2p <sub>rv</sub> : CGTGTGTGTCAGGATGAGTT<br>BsrDI: GCAATGNN (incubation, 65°C)                                                                  | 58            | D/D: Deletion carriers at 545bp (undigested)<br>I/I: Insertion carriers 2 band 382bp and 167bp           |
| A392S- <i>CYP6M2</i>                       | AS-PCR   | 6M2f <sub>w</sub> : TGATGAGCAAAGACGGAGAGAAGT<br>6M2r <sub>v</sub> : CATAACGAATCGCAGCCCAAC<br>A392f <sub>w</sub> : CGGTACGAAATCCGTCCTGGtGG<br>392S <sub>r</sub> v: GGATCATGACGGCTGTACCcGA        | 50            | 392S/S at 527bp<br>A/A392 at 202bp<br>A392S-RS, two bands                                                |
| A/T in <i>CYP6P4</i> promoter              | RFLP-PCR | 6p4p1f <sub>w</sub> : TCGATCCGAAATCGTTCATACTC<br>6p4p1r <sub>v</sub> : CCGCGTTTACTTGATGGTGTGAG<br>PvuII: CAGCTG (incubation, 37°C)                                                              | 58            | D+/D+ (T/T): Deletion carriers at 548bp (undigested)<br>D-/D-: Insertion carriers 2 band 374bp and 168bp |
| c/t in in <i>CYP6P4</i> -gene at codon 144 | RFLP-PCR | 6p4-ful1f <sub>w</sub> : GCGCATGAAAGCTAGGGAT<br>6p4-ful1r <sub>v</sub> : GCCAGCTCGTTCATCGTCAG<br>EagI: CGGTCTG (incubation, 37°C)                                                               | 61,5          | t/t at 600bp (undigested)<br>c/c, two bands at 357bp and 269bp                                           |
| C168S- <i>CYP6P4</i>                       | AS-PCR   | 6p4-ful1f <sub>w</sub> : GCGCATGAAAGCTAGGGAT<br>6p4-ful1r <sub>v</sub> : GCCAGCTCGTTCATCGTCAG<br>502A <sub>r</sub> v: CCTTCATCTCAATCTCGCGGTGcCT<br>502Tf <sub>w</sub> : CTTGAAGTATATGAACGAGCtCT | 57            | A168A at 614bp<br>T168T at 426bp<br>A168T-RS, two bands                                                  |

fw, forward primer; rv, reverse primer; D, Deletion; I, insertion; S, Serine; A, Alanine; C, Cysteine; S, Serine; t, thymine; a, adenine; c, cytosine;

**Table S3.** Genotype and allele frequencies of 1014F *ldr* mutations in *An. gambiae* and *An. coluzzii* populations

| Population          | Genotype |    |    | N  | 2N  | Allele |      |
|---------------------|----------|----|----|----|-----|--------|------|
|                     | RR       | RS | SS |    |     | f(R)   | f(S) |
| <i>An. gambiae</i>  |          |    |    |    |     |        |      |
| F <sub>0</sub>      | 30       | 0  | 0  | 30 | 60  | 1.00   | 0.00 |
| HR F <sub>4</sub>   | 40       | 18 | 0  | 58 | 116 | 0.84   | 0.16 |
| HS F <sub>4</sub>   | 1        | 15 | 37 | 53 | 106 | 0.16   | 0.84 |
| <i>An. coluzzii</i> |          |    |    |    |     |        |      |
| F <sub>0</sub>      | 26       | 4  | 0  | 30 | 60  | 0.93   | 0.07 |
| HR F <sub>4</sub>   | 18       | 12 | 0  | 30 | 60  | 0.80   | 0.20 |
| HS F <sub>4</sub>   | 0        | 4  | 26 | 30 | 60  | 0.07   | 0.93 |

**RR**, homozygous resistant, **RS**, heterozygous resistant, **SS**, homozygous susceptible.

**Table S4.** Frequency of key mutations found and genetic variability parameters of *CYP6M2* per allele in *An. gambiae*

| Pop.               | Region    | Position           | Sample               | Ref. seq. | Mut. Seq. | Aa change | Type of mut. | Mutation freq. (%) | n/N     |
|--------------------|-----------|--------------------|----------------------|-----------|-----------|-----------|--------------|--------------------|---------|
| <i>An. gambiae</i> | upstream  | Indel <sup>#</sup> | Kisumu               | T(ins.)   | C(del.)   | n.a       | n.a          | 0.00               | 0/3     |
|                    |           |                    | HS (F4)              | T(ins.)   | C(del.)   | n.a       | n.a          | 0.83               | 1/6     |
|                    |           |                    | HR (F4)              | T(ins.)   | C(del.)   | n.a       | n.a          | 0.88               | 1/8     |
|                    | Full-gene | 1 252 (codon 392)  | Kisumu               | GCC       | TCC       | A/S       | NSyn         | 0.00               | 0/7     |
|                    |           |                    | HS (F <sub>4</sub> ) | GCC       | TCC       | A/S       | NSyn         | 0.57               | 4/7     |
|                    |           |                    | HR (F <sub>4</sub> ) | GCC       | TCC       | A/S       | NSyn         | 0.71               | 5/7     |
| <i>CYP6M2</i>      |           | Allele             | 2n                   | S         | H         | Hd        | π            | D                  | D*      |
|                    |           | 392S               | 18                   | 25        | 11        | 0.889     | 0.0059       | 1.028              | 1.572   |
|                    |           | 392A               | 24                   | 33        | 9         | 0.899     | 0.0089       | 2.074*             | 1.668** |
|                    |           | All                | 42                   | 51        | 20        | 0.948     | 0.0124       | 2.124*             | 1.929** |

2n, number of sequences (2n\* = Sequences were unphased because of the observed heterozygosity); D, Tajima's statistics; D\*, Fu and Li's statistics; H, number of haplotypes; Hd, haplotype diversity; Syn, Synonymous mutations; Nsyn, Non-synonymous mutations;  $\pi$ , nucleotide diversity; S, number of polymorphic sites; pKa: Synonymous polymorphism per site; pKs: non-Synonymous polymorphism per site; \* =  $P < 0.05$ ; \*\* =  $P < 0.02$ ; n=number of samples containing mutant allele; N= total number of successfully sequenced samples; n.a, non-available; #, associated to a point mutation at 322 position.

**Table S5.** Frequency of key mutations found and genetic variability parameters of intergenic region between *CYP6P4* and *CYP6P5* per allele in *An. gambiae*

| Pop.               | Region   | Position           | Sample               | Ref. seq. | Mut. Seq. | Mutation freq. (%) | n/N     |
|--------------------|----------|--------------------|----------------------|-----------|-----------|--------------------|---------|
| <i>An. gambiae</i> | promoter | Indel <sup>#</sup> | Kisumu               | A         | T         | 0.14               | 1.5/8   |
|                    |          |                    | HS (F <sub>4</sub> ) | A         | T         | 0.44               | 4/9     |
|                    |          |                    | HR (F <sub>4</sub> ) | A         | T         | 1.00               | 6/6     |
| <i>CYP6P4pr</i>    | Allele   | 2n                 | S                    | H(Hd)     | π         | D                  | D*      |
|                    | 273-T    | 21                 | 5                    | 5(0.595)  | 0.0013    | -0.618             | 1.339   |
|                    | 273-A    | 23                 | 19                   | 7(0.834)  | 0.0094    | 2.108*             | 1.374** |
|                    | All      | 44                 | 19                   | 11(0.838) | 0.0083    | 2.047*             | 1.655** |

*pr*, promoter; 2n, 2n, number of sequences (2n\* = Sequences were unphased because of the observed heterozygosity); S, number of polymorphic sites; H, number of haplotypes; Hd, haplotype diversity; π, nucleotide diversity; D, Tajima's statistics; D \*, Fu and Li's statistics; \* = P < 0.05; \*\* = P < 0.02; n=number of samples containing mutant allele; N = total number of successfully sequenced samples; #, associated to a point mutation at 273 position.

**Table S6.** Frequency of key mutations found and genetic variability parameters of the upstream region of mutation per allele in *An. gambiae*

| Pop.               | Region    | Position    | Sample               | Ref. seq. | Mut. Seq. | Aa change | Type of mut. | Mutation freq. (%) | n/N    |
|--------------------|-----------|-------------|----------------------|-----------|-----------|-----------|--------------|--------------------|--------|
| <i>An. gambiae</i> | Full-gene | 432         | Kisumu               | GGC       | GGT       | G/G       | Syn          | 0.20               | 2/10   |
|                    |           | (codon 144) | HS (F <sub>4</sub> ) | GGC       | GGT       | G/G       | Syn          | 0.28               | 4.5/9  |
|                    |           |             | HR (F <sub>4</sub> ) | GGC       | GGT       | G/G       | Syn          | 0.95               | 9.5/10 |
|                    |           | 502         | Kisumu               | TGC       | AGC       | C/S       | NSyn         | 0.15               | 1.5/10 |
|                    |           | (codon 168) | HS (F <sub>4</sub> ) | TGC       | AGC       | C/S       | NSyn         | 0.27               | 2.5/9  |
|                    |           |             | HR (F <sub>4</sub> ) | TGC       | AGC       | C/S       | NSyn         | 0.70               | 7/10   |
|                    |           | Alleles     | 2n                   | S         | H         | Hd        | π            | D                  | D*     |
| <i>CYP6P4</i>      | 144-T     | 32          | 17                   | 19        | 0.920     | 0.005     | 0.665        | 1.365              |        |
|                    | 144-C     | 26          | 13                   | 15        | 0.950     | 0.005     | 1.854        | 1.330              |        |
|                    | 168S      | 22          | 12                   | 11        | 0.861     | 0.0033    | 1.096        | 1,470              |        |
|                    | 168C      | 36          | 14                   | 22        | 0.968     | 0.0053    | 2.128*       | 1,441**            |        |
|                    | All       | 58          | 17                   | 33        | 0.970     | 0.0062    | 2.385*       | 1.632**            |        |

2n, number of sequences (2n\* = Sequences were unphased because of the observed heterozygosity); D, Tajima's statistics; D \*, Fu and Li's statistics; H, number of haplotypes; Hd, haplotype diversity; Syn, Synonymous mutations; NSyn, Non-synonymous mutations;  $\pi$ , nucleotide diversity; S, number of polymorphic sites; pKa: Synonymous polymorphism per site; pKs: non-Synonymous polymorphism per site; \* =  $P < 0.05$ ; \*\* =  $P < 0.02$ ; n=number of samples containing mutant allele; N = total number of successfully sequenced samples.
